# Supplementary material for: Empathy Adds Incrementally to the Association of Self-Efficacy and Optimism with Psychological Health in Healthcare Volunteers
Source: Preprints.org preprint supplement (doi:10.20944/preprints202007.0335.v1), 2020-07-15
Supplement: Supplementary file 1 [file Supplementary Materials.doc]

**Supplementary Materials**

**Figure S1.** Normal P-P Plot of regression standard. residuals. Dependent variable: Psychological well-being (PWBS)


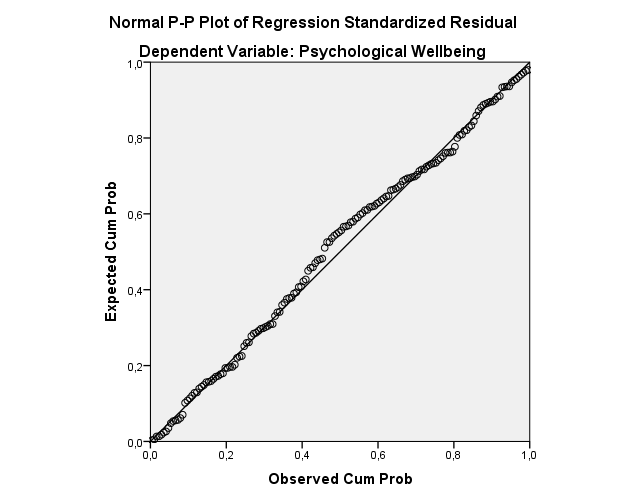


**Figure S2.** Normal P-P Plot of regression standard. residuals. Dependent variable: Subjective well-being (WHO-5)


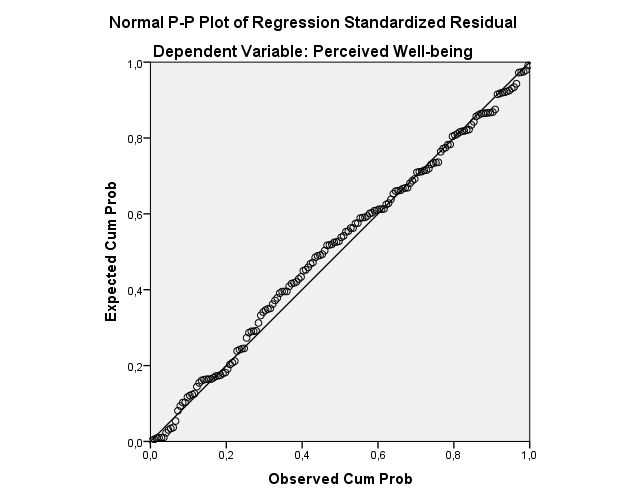


**Figure S3.** Scatterplot. Dependent variable: Psychological well-being (PWBS)


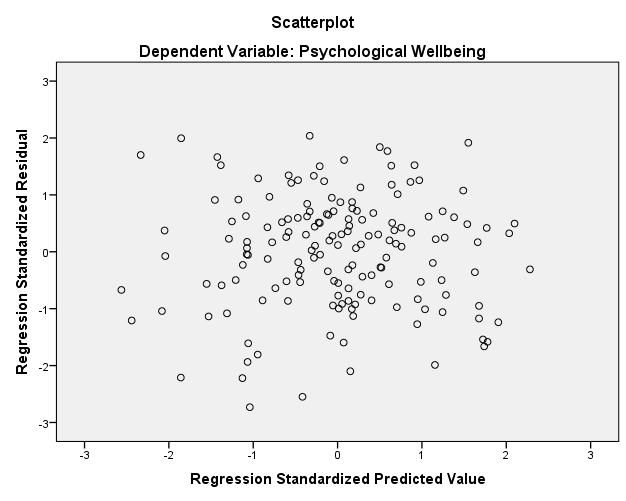


**Figure S4.** Scatterplot. Dependent variable: Subjective well-being (WHO-5)


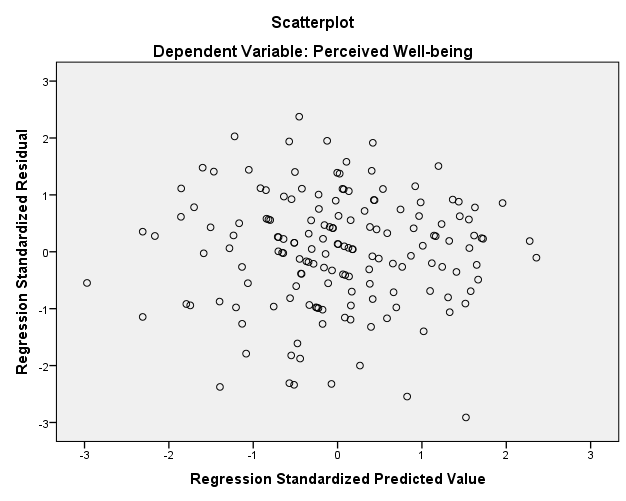


**Table S1. Regression coefficients and collinearity statistics for Psychological well-being (PWBS)**

|  | | | | | | | | |
| --- | --- | --- | --- | --- | --- | --- | --- | --- |
| Model a | | **Unstandardized Coefficients** | | **Standardized Coefficients** | ***t*** | ***p-value*** | **Collinearity Statistics** | |
| ***B*** | ***Std. Error*** | ***Beta*** | ***Tolerance*** | ***VIF*** |
| 1 | (Constant) | 41.05 | 6.209 |  | 6.611 | < 0.001 |  |  |
| Efficacy | 0.50 | 0.087 | 0.39 | 5.735 | < 0.001 | 0.906 | 1.104 |
| Optimism | 1.01 | 0.210 | 0.33 | 4.797 | < 0.001 | 0.906 | 1.104 |
| 2 | (Constant) | 40.40 | 6.143 |  | 6.576 | < 0.001 |  |  |
| Efficacy | 0.43 | 0.093 | 0.33 | 4.575 | < 0.001 | 0.781 | 1.281 |
| Optimism | 0.93 | 0.211 | 0.30 | 4.395 | < 0.001 | 0.878 | 1.139 |
| Prospective | 0.39 | 0.177 | 0.16 | 2.183 | 0.031 | 0.793 | 1.261 |
| 3 | (Constant) | 50.89 | 7.599 |  | 6.696 | < 0.001 |  |  |
| Efficacy | 0.34 | 0.099 | 0.27 | 3.481 | 0.001 | 0.676 | 1.478 |
| Optimism | 0.91 | 0.208 | 0.29 | 4.345 | < 0.001 | 0.876 | 1.142 |
| Prospective | 0.35 | 0.175 | 0.14 | 1.989 | 0.048 | 0.786 | 1.272 |
| Distress | -0.39 | 0.171 | -0.16 | -2.288 | 0.023 | 0.790 | 1.267 |
| a. Dependent variable: Psychological well-being (PWBS) | | | | | | | | |

**Table S2. Regression coefficients and collinearity statistics for Subjective well-being (WHO-5)**

|  | | | | | | | | |
| --- | --- | --- | --- | --- | --- | --- | --- | --- |
| Model a | | **Unstandardized Coefficients** | | **Standardized Coefficients** |  |  | **Collinearity Statistics** | |
|  | | ***B*** | ***Std. Error*** | ***Beta*** | ***t*** | ***p-value*** | ***Tolerance*** | ***VIF*** |
| 1 | (Constant) | 1.61 | 2.7759 |  | 0.581 | 0.561 |  |  |
|  | Efficacy | 0.16 | 0.039 | 0.32 | 4.205 | < 0.001 | 0.906 | 1.104 |
|  | Optimism | 0.18 | 0.094 | 0.15 | 1.954 | 0.050 | 0.906 | 1.104 |
| 2 | (Constant) | 1.21 | 2.705 |  | 0.445 | 0.657 |  |  |
|  | Efficacy | 0.12 | 0.041 | 0.23 | 2.858 | 0.005 | 0.781 | 1.281 |
|  | Optimism | 0.13 | 0.093 | 0.11 | 1.431 | 0.154 | 0.878 | 1.139 |
|  | Prospective | 0.24 | 0.078 | 0.25 | 3.093 | 0.002 | 0.793 | 1.261 |
| 3 | (Constant) | 4.72 | 3.370 |  | 1.402 | 0.163 |  |  |
|  | Efficacy | 0.09 | 0.044 | 0.18 | 2.045 | 0.043 | 0.676 | 1.478 |
|  | Optimism | 0.13 | 0.092 | 0.10 | 1.360 | 0.176 | 0.876 | 1.142 |
|  | Prospective | 0.23 | 0.078 | 0.24 | 2.938 | 0.004 | 0.786 | 1.272 |
|  | Distress | -0.13 | 0.076ì | -0.14 | -1.733 | 0.085 | 0.790 | 1.267 |
| a. Dependent variable: Subjective well-being (WHO-5) | | | | | | | | |

***Table S3.*** *Pearson’s correlations of continuous sociodemographic variables with the outcomes*

|  | **Age** | | **Length of volunteering experience (months)** | |
| --- | --- | --- | --- | --- |
|  | ***r*** | ***p-value*** | ***r*** | ***p-value*** |
| Psychological well-being (PWBS) | 0.08 | 0.31 | 0.09 | 0.25 |
| Subjective well-being (WHO-5) | 0.07 | 0.40 | -0.08 | 0.40 |

**Table S4.** Descriptive statistics of Psychological Well-Being (PWBS) by categorical sociodemographic variables

| **Gender** | **Education** | **Previous Experience as** | ***M*** | ***SD*** | ***n*** |
| --- | --- | --- | --- | --- | --- |
| Male | High school | No experience | 92.50 | 12.90 | 10 |
| Previous experience | 94.46 | 12.27 | 24 |
| Total | 93.88 | 12.29 | 34 |
| University | No experience | 93.11 | 10.39 | 9 |
| Previous experience | 98.13 | 11.57 | 15 |
| Total | 96.25 | 11.19 | 24 |
| Total | No experience | 92.79 | 11.46 | 19 |
| Previous experience | 95.87 | 11.99 | 39 |
| Total | 94.86 | 11.81 | 58 |
| Female | High school | No experience | 92.89 | 7.90 | 18 |
| Previous experience | 92.59 | 11.52 | 29 |
| Total | 92.70 | 10.19 | 47 |
| University | No experience | 88.89 | 13.06 | 18 |
| Previous experience | 96.38 | 10.44 | 37 |
| Total | 93.93 | 11.79 | 55 |
| Total | No experience | 90.89 | 10.83 | 36 |
| Previous experience | 94.71 | 11.00 | 66 |
| Total | 93.36 | 11.04 | 102 |

**Table S5.** Associations of categorical sociodemographic variables with Psychological well-being (PWBS):

ANOVA tests of between-subjects effects

|  | **Type III sum of squares** | ***df*** | **Mean square** | ***F*** | ***p-value*** |
| --- | --- | --- | --- | --- | --- |
| Corrected model | 1049.22 | 7 | 149.89 | 1.18 | 0.317 |
| Intercept | 1139927.52 | 1 | 1139927.52 | 8979.35 | 0.001 |
| Gender | 113.11 | 1 | 113.11 | 0.89 | 0.35 |
| Education | 33.80 | 1 | 33.80 | 0.27 | 0.61 |
| Previous Experience | 407.90 | 1 | 407.90 | 3.21 | 0.08 |
| Gender * Education | 41.04 | 1 | 41.04 | 0.32 | 0.57 |
| Gender * Previous Experience | 0.09 | 1 | 0.09 | 0.01 | 0.98 |
| Education * Previous Experience | 239.51 | 1 | 239.51 | 1.89 | 0.17 |
| Gender * Education * Previous Exp. | 45.43 | 1 | 45.43 | 0.36 | 0.55 |
| Error | 19296.37 | 152 | 126.95 |  |  |
| Total | 1431287.00 | 160 |  |  |  |
| Corrected total | 20345.59 | 159 |  |  |  |

**Table S6.** Descriptive statistics of Subjective well-being (WHO-5) by categorical sociodemographic variables

| **Gender** | **Education** | **Previous Experience** | ***M*** | ***SD*** | ***n*** |
| --- | --- | --- | --- | --- | --- |
| Male | High school | No experience | 18.10 | 2.92 | 10 |
| Previous experience | 16.42 | 5.07 | 24 |
| Total | 16.91 | 4.57 | 34 |
| University | No experience | 16.56 | 3.64 | 9 |
| Previous experience | 14.80 | 5.36 | 15 |
| Total | 15.46 | 4.78 | 24 |
| Total | No experience | 17.37 | 3.29 | 19 |
| Previous experience | 15.79 | 5.18 | 39 |
| Total | 16.31 | 4.67 | 58 |
| Female | High school | No experience | 15.83 | 4.45 | 18 |
| Previous experience | 17.31 | 5.07 | 29 |
| Total | 16.74 | 4.85 | 47 |
| University | No experience | 15.39 | 4.01 | 18 |
| Previous experience | 16.81 | 3.95 | 37 |
| Total | 16.35 | 3.99 | 55 |
| Total | No experience | 15.61 | 4.18 | 36 |
| Previous experience | 17.03 | 4.45 | 66 |
| Total | 16.53 | 4.39 | 102 |

**Table S7.** Associations of categorical sociodemographic variables with Subjective well-being (WHO-5):

ANOVA tests of between-subjects effects.

|  | **Type III sum of squares** | ***df*** | **Mean square** | ***F*** | ***p-value*** |
| --- | --- | --- | --- | --- | --- |
| Corrected model | 121.58 | 7 | 17.37 | 0.86 | 0.54 |
| Intercept | 34990.34 | 1 | 34990.34 | 1733.54 | 0.001 |
| Gender | 0.57 | 1 | 0.57 | 0.03 | 0.87 |
| Education | 34.25 | 1 | 34.25 | 1.70 | 0.19 |
| Previous Experience | 0.59 | 1 | 0.59 | 0.03 | 0.86 |
| Gender * Education | 9.99 | 1 | 9.99 | 0.49 | 0.48 |
| Gender * Previous Experience | 80.63 | 1 | 80.63 | 3.04 | 0.06 |
| Education * Previous Experience | 0.03 | 1 | 0.03 | 0.00 | 0.97 |
| Gender * Education * Previous Exp. | 0.001 | 1 | 0.001 | 0.00 | 0.99 |
| Error | 3068.02 | 152 | 20.18 |  |  |
| Total | 46486.00 | 160 |  |  |  |
| Corrected total | 3189.60 | 159 |  |  |  |
